# Supplementary material for: Evaluation of Predict, a prognostic risk tool, after diagnosis of a second breast cancer
Source: PubMed Central journal article supplement (PMC10660126; doi:10.1093/jncics/pkad081), 2023-09-29
Supplement: pkad081_supplementary_data.pdf [file pkad081_supplementary_data.pdf]

Supplementary Table 1. Area under the curve (AUC) of PREDICT model by race and ethnicity for first and second breast cancer by estrogen receptor (ER) status.

|                    | First breast cancer |             | Second breast cancer |             |
|--------------------|---------------------|-------------|----------------------|-------------|
|                    | ER-positive         | ER-negative | ER-positive          | ER-negative |
| Non-Hispanic White | 0.817               | 0.754       | 0.727                | 0.723       |
| Non-Hispanic Black | 0.806               | 0.751       | 0.796                | 0.724       |
| Hispanic           | 0.813               | 0.753       | 0.802                | 0.775       |
| Other <sup>1</sup> | 0.831               | 0.744       | 0.697                | 0.755       |

<sup>1</sup>Other included Non-Hispanic Asian and Pacific Islander, Non-Hispanic American Indian and Alaska Native

Supplementary Table 2. Model performance when 50% of breast cancers were detected by screening.

|             | First breast cancer       |                                |                               |                                                     |                                               | Second breast cancer      |                                |                               |                                                     |                                               |
|-------------|---------------------------|--------------------------------|-------------------------------|-----------------------------------------------------|-----------------------------------------------|---------------------------|--------------------------------|-------------------------------|-----------------------------------------------------|-----------------------------------------------|
|             | Total number of cases (N) | Predicted number of deaths (P) | Observed number of deaths (O) | Absolute mortality difference (95% CI) <sup>1</sup> | Relative mortality ratio (95%CI) <sup>2</sup> | Total number of cases (N) | Predicted number of deaths (P) | Observed number of deaths (O) | Absolute mortality difference (95% CI) <sup>1</sup> | Relative mortality ratio (95%CI) <sup>2</sup> |
| ER-positive | 303837                    | 13734                          | 13855                         | -0.04 (-0.11,0.03)                                  | 0.99 (0.98,1.01)                              | 5606                      | 215                            | 556                           | -6.08 (-6.81,-5.34)                                 | 0.39 (0.36,0.42)                              |
| ER-negative | 53367                     | 11768                          | 9343                          | 4.54 (4.27,4.86)                                    | 1.26 (1.24,1.28)                              | 1123                      | 210                            | 229                           | -1.69 (-3.99,0.16)                                  | 0.92 (0.83,1.01)                              |

ER: estrogen receptor  
<sup>1</sup>Absolute mortality difference=P-O  
<sup>2</sup>Relative mortality ratio=P/O

Supplementary Table 3. Model performance when chemotherapy was 2<sup>nd</sup> or 3<sup>rd</sup> generation for all calendar years.

|                                                                    | First breast cancer       |                                |                               |                                                     |                                               | Second breast cancer      |                                |                               |                                                     |                                               |
|--------------------------------------------------------------------|---------------------------|--------------------------------|-------------------------------|-----------------------------------------------------|-----------------------------------------------|---------------------------|--------------------------------|-------------------------------|-----------------------------------------------------|-----------------------------------------------|
|                                                                    | Total number of cases (N) | Predicted number of deaths (P) | Observed number of deaths (O) | Absolute mortality difference (95% CI) <sup>1</sup> | Relative mortality ratio (95%CI) <sup>2</sup> | Total number of cases (N) | Predicted number of deaths (P) | Observed number of deaths (O) | Absolute mortality difference (95% CI) <sup>1</sup> | Relative mortality ratio (95%CI) <sup>2</sup> |
| Chemotherapy was 2 <sup>nd</sup> generation for all calendar years |                           |                                |                               |                                                     |                                               |                           |                                |                               |                                                     |                                               |
| ER-positive                                                        | 303837                    | 14123                          | 13855                         | 0.09 (0.02,0.16)                                    | 1.02 (1,1.04)                                 | 5606                      | 219                            | 556                           | -6.01 (-6.73,-5.25)                                 | 0.39 (0.37,0.43)                              |
| ER-negative                                                        | 53367                     | 13000                          | 9343                          | 6.85 (6.58,7.17)                                    | 1.39 (1.37,1.42)                              | 1123                      | 241                            | 229                           | 1.07 (-1.18,2.97)                                   | 1.05 (0.95,1.16)                              |
| Chemotherapy was 3 <sup>rd</sup> generation for all calendar years |                           |                                |                               |                                                     |                                               |                           |                                |                               |                                                     |                                               |
| ER-positive                                                        | 303837                    | 12776                          | 13855                         | -0.36 (-0.43,-0.28)                                 | 0.92 (0.91,0.94)                              | 5606                      | 205                            | 556                           | -6.26 (-6.98,-5.51)                                 | 0.37 (0.34,0.4)                               |
| ER-negative                                                        | 53367                     | 11159                          | 9343                          | 3.4 (3.13,3.71)                                     | 1.19 (1.18,1.22)                              | 1123                      | 207                            | 229                           | -1.96 (-4.27,-0.07)                                 | 0.9 (0.81,1)                                  |

ER: estrogen receptor  
<sup>1</sup>Absolute mortality difference=P-O  
<sup>2</sup>Relative mortality ratio=P/O
